# Supplementary material for: SSRI use during acute COVID-19 and risk of Long COVID among patients with depression
Source: PubMed Central journal article supplement (PMC11462648; doi:10.1186/s12916-024-03655-x), 2024-10-08
Supplement: 12916_2024_3655_MOESM1_ESM.pdf [file 12916_2024_3655_MOESM1_ESM.pdf]

Supplemental Table 1. List of depressive conditions

| Concept Name                                                                                | Concept Code      | Concept Id | Domain Id | Vocabulary Id  | Concept Class Id |
|---------------------------------------------------------------------------------------------|-------------------|------------|-----------|----------------|------------------|
| Recurrent major depressive disorder co-occurrent with anxiety disorder                      | 16265061000119105 | 35615154   | Condition | SNOMED         | Disorder         |
| Major depression, melancholic type                                                          | 320751009         | 4154391    | Condition | SNOMED         | Disorder         |
| Severe major depression, single episode, without psychotic features                         | 76441001          | 441534     | Condition | SNOMED         | Disorder         |
| Secondary dysthymia late onset                                                              | 36170009          | 4263770    | Condition | SNOMED         | Disorder         |
| Recurrent major depressive episodes, severe, with psychotic features                        | 191613003         | 434911     | Condition | SNOMED         | Disorder         |
| Reactive depression, first episode                                                          | 1086691000000102  | 35609845   | Condition | SNOMED         | Disorder         |
| Recurrent major depressive episodes, mild                                                   | 191610000         | 438998     | Condition | SNOMED         | Disorder         |
| Reactive depression (situational)                                                           | 87414006          | 4314692    | Condition | SNOMED         | Disorder         |
| Depressive disorder in mother complicating childbirth                                       | 10835871000119104 | 45757213   | Condition | SNOMED         | Disorder         |
| Depressive disorder caused by drug                                                          | 191495003         | 4103126    | Condition | SNOMED         | Disorder         |
| Mood disorder with depressive symptoms caused by volatile substances                        | 762339009         | 42538599   | Condition | SNOMED         | Disorder         |
| Persistent depressive disorder                                                              | 1153575004        | 607543     | Condition | SNOMED         | Disorder         |
| Recurrent depression with current severe episode and psychotic features                     | 1089511000000100  | 35610097   | Condition | SNOMED         | Disorder         |
| Major depression in partial remission                                                       | 30605009          | 4148630    | Condition | SNOMED         | Disorder         |
| Severe major depression without psychotic features                                          | 75084000          | 4327337    | Condition | SNOMED         | Disorder         |
| Recurrent major depressive episodes, severe                                                 | 764611000000100   | 44805542   | Condition | SNOMED         | Disorder         |
| Major depression with psychotic features                                                    | 726772006         | 37111697   | Condition | SNOMED         | Disorder         |
| Reactive depression, prolonged single episode                                               | 1086661000000108  | 35609842   | Condition | SNOMED         | Disorder         |
| Endogenous depression                                                                       | 300706003         | 4114950    | Condition | SNOMED         | Disorder         |
| Depressive conduct disorder                                                                 | 231542000         | 4333687    | Condition | SNOMED         | Disorder         |
| Severe seasonal affective disorder                                                          | 133121000119109   | 44782720   | Condition | SNOMED         | Disorder         |
| Depressive disorder caused by amphetamine                                                   | 16238181000119101 | 37209503   | Condition | SNOMED         | Disorder         |
| Major depression in full remission                                                          | 63412003          | 4269493    | Condition | SNOMED         | Disorder         |
| Secondary dysthymia                                                                         | 85080004          | 4224639    | Condition | SNOMED         | Disorder         |
| Agitated depression                                                                         | 83458005          | 4308866    | Condition | SNOMED         | Disorder         |
| Generalized neuromuscular exhaustion syndrome                                               | 87842000          | 4336980    | Condition | SNOMED         | Disorder         |
| Mild recurrent major depression                                                             | 40379007          | 4228802    | Condition | SNOMED         | Disorder         |
| Reactive depressive psychosis, single episode                                               | 288751000119101   | 43020483   | Condition | SNOMED         | Disorder         |
| Severe major depression, single episode                                                     | 251000119105      | 42872411   | Condition | SNOMED         | Disorder         |
| Atypical depressive disorder                                                                | 191659001         | 438727     | Condition | SNOMED         | Disorder         |
| Severe major depression with psychotic features, mood-incongruent                           | 60099002          | 4243822    | Condition | SNOMED         | Disorder         |
| Exacerbation of depressive disorder                                                         | OMOP5165960       | 1340305    | Condition | OMOP Extension | Disorder         |
| Recurrent brief depressive disorder                                                         | 40568001          | 4226155    | Condition | SNOMED         | Disorder         |
| Mood disorder with depressive symptoms caused by hallucinations                             | 762336002         | 42538596   | Condition | SNOMED         | Disorder         |
| Recurrent major depression in remission                                                     | 68019004          | 433991     | Condition | SNOMED         | Disorder         |
| Recurrent major depressive disorder with postpartum onset                                   | 71336009          | 4324959    | Condition | SNOMED         | Disorder         |
| Late onset dysthymia                                                                        | 19694002          | 4057218    | Condition | SNOMED         | Disorder         |
| Major depression single episode, in partial remission                                       | 70747007          | 4323418    | Condition | SNOMED         | Disorder         |
| Multi-infarct dementia with depression                                                      | 14070001          | 443864     | Condition | SNOMED         | Disorder         |
| Severe recurrent major depression without psychotic features                                | 36474008          | 435220     | Condition | SNOMED         | Disorder         |
| Recurrent moderate major depressive disorder co-occurrent with anxiety disorder             | 16264901000119109 | 35615153   | Condition | SNOMED         | Disorder         |
| Severe major depression, single episode, with psychotic features                            | 77911002          | 4299785    | Condition | SNOMED         | Disorder         |
| Primary dysthymia late onset                                                                | 67711008          | 4195680    | Condition | SNOMED         | Disorder         |
| Reactive depression, recurrent                                                              | 1086681000000104  | 35609844   | Condition | SNOMED         | Disorder         |
| Chronic recurrent major depressive disorder                                                 | 2618002           | 4094358    | Condition | SNOMED         | Disorder         |
| Moderate major depression, single episode                                                   | 15639000          | 4049623    | Condition | SNOMED         | Disorder         |
| Mood disorder with depressive symptoms caused by cocaine                                    | 724690002         | 37110438   | Condition | SNOMED         | Disorder         |
| Recurrent depression with current severe episode without psychotic features                 | 1089631000000109  | 35610108   | Condition | SNOMED         | Disorder         |
| Severe recurrent major depression                                                           | 281000119103      | 43531624   | Condition | SNOMED         | Disorder         |
| Moderate depression                                                                         | 310496002         | 4151170    | Condition | SNOMED         | Disorder         |
| Dysthymia                                                                                   | 78667006          | 433440     | Condition | SNOMED         | Disorder         |
| Major depressive disorder, single episode with postpartum onset                             | 25922000          | 4093584    | Condition | SNOMED         | Disorder         |
| Recurrent reactive depressive episodes, severe, with psychotic features                     | 1086471000000103  | 35609824   | Condition | SNOMED         | Disorder         |
| Perinatal depression                                                                        | 10211000132109    | 36712668   | Condition | SNOMED         | Disorder         |
| Recurrent mild major depressive disorder co-occurrent with anxiety disorder                 | 16264621000119109 | 35615151   | Condition | SNOMED         | Disorder         |
| Recurrent major depressive disorder in partial remission co-occurrent with anxiety disorder | 16265301000119106 | 35615155   | Condition | SNOMED         | Disorder         |
| Recurrent major depression                                                                  | 66344007          | 4282316    | Condition | SNOMED         | Disorder         |
| Chronic depressive personality disorder                                                     | 442057004         | 40481798   | Condition | SNOMED         | Disorder         |
| Recurrent depression with current moderate episode                                          | 1089641000000100  | 35610109   | Condition | SNOMED         | Disorder         |
| Postoperative depression                                                                    | 82218004          | 4305966    | Condition | SNOMED         | Disorder         |
| Reactive depression, single episode                                                         | 1086671000000101  | 35609843   | Condition | SNOMED         | Disorder         |
| Seasonal affective disorder                                                                 | 247803002         | 4092239    | Condition | SNOMED         | Disorder         |
| Menopausal depression                                                                       | 84788008          | 4223090    | Condition | SNOMED         | Disorder         |
| Severe recurrent major depression with psychotic features, mood-congruent                   | 15193003          | 4034842    | Condition | SNOMED         | Disorder         |
| Recurrent major depressive episodes                                                         | 268621008         | 432285     | Condition | SNOMED         | Disorder         |
| Severe major depression, single episode, with psychotic features                            | 20250007          | 4067409    | Condition | SNOMED         | Disorder         |
| Moderate recurrent major depression                                                         | 18818009          | 4077577    | Condition | SNOMED         | Disorder         |
| Minimal major depression                                                                    | 720455008         | 36715000   | Condition | SNOMED         | Disorder         |

|                                                              |                   |          |           |                |          |
|--------------------------------------------------------------|-------------------|----------|-----------|----------------|----------|
| Minimal major depression single episode                      | 720454007         | 36714999 | Condition | SNOMED         | Disorder |
| Mood disorder with major depressive-like episode due to gr   | 77486005          | 4298317  | Condition | SNOMED         | Disorder |
| Major depression in remission                                | 42810003          | 4176002  | Condition | SNOMED         | Disorder |
| Antenatal depression                                         | 788120007         | 37312479 | Condition | SNOMED         | Disorder |
| Recurrent major depressive disorder with atypical features   | 38694004          | 4304140  | Condition | SNOMED         | Disorder |
| Endogenous depression first episode                          | 231499006         | 4333679  | Condition | SNOMED         | Disorder |
| Mood disorder with depressive symptoms caused by amphi       | 838530009         | 3654788  | Condition | SNOMED         | Disorder |
| Depressive disorder in mother complicating pregnancy         | 94631000119100    | 37018656 | Condition | SNOMED         | Disorder |
| Moderately severe recurrent major depression                 | 720452006         | 36714998 | Condition | SNOMED         | Disorder |
| Recurrent major depression in partial remission              | 33135002          | 4141454  | Condition | SNOMED         | Disorder |
| Stuporous depression                                         | 79842004          | 4197222  | Condition | SNOMED         | Disorder |
| Depressive disorder                                          | 35489007          | 440383   | Condition | SNOMED         | Disorder |
| Single major depressive episode, in remission                | 764711000000106   | 44805550 | Condition | SNOMED         | Disorder |
| Recurrent severe major depressive disorder co-occurent w     | 16264821000119108 | 35615152 | Condition | SNOMED         | Disorder |
| Severe major depressive disorder co-occurent with anxiety    | 16266991000119108 | 37109054 | Condition | SNOMED         | Disorder |
| Recurrent major depressive disorder with catatonic featu     | 39809009          | 4220023  | Condition | SNOMED         | Disorder |
| Recurrent major depression in full remission                 | 46244001          | 4263748  | Condition | SNOMED         | Disorder |
| Recurrent major depressive episodes, in remission            | 764701000000109   | 44813499 | Condition | SNOMED         | Disorder |
| Moderate major depression                                    | 832007            | 4307111  | Condition | SNOMED         | Disorder |
| Minimal depression                                           | 718636001         | 36713698 | Condition | SNOMED         | Disorder |
| Mixed anxiety and depressive disorder                        | 231504006         | 4338031  | Condition | SNOMED         | Disorder |
| Mild major depression, single episode                        | 79298009          | 4195572  | Condition | SNOMED         | Disorder |
| Severe postnatal depression                                  | 237350002         | 4129184  | Condition | SNOMED         | Disorder |
| Mood disorder with depressive symptoms caused by sedati      | 724676000         | 37117211 | Condition | SNOMED         | Disorder |
| Major depressive disorder, single episode with atypical feat | 42925002          | 4181807  | Condition | SNOMED         | Disorder |
| Chronic depression                                           | 192080009         | 4103574  | Condition | SNOMED         | Disorder |
| Mood disorder with depressive symptoms caused by stimul      | 762329003         | 42538590 | Condition | SNOMED         | Disorder |
| Mild postnatal depression                                    | 237349002         | 4129842  | Condition | SNOMED         | Disorder |
| Mood disorder with depressive symptoms caused by synth       | 762512002         | 42538736 | Condition | SNOMED         | Disorder |
| Reactive depressive psychosis                                | 191676002         | 435520   | Condition | SNOMED         | Disorder |
| Premenstrual dysphoric disorder in remission                 | 426578000         | 4145216  | Condition | SNOMED         | Disorder |
| Early onset dysthymia                                        | 2506003           | 4096229  | Condition | SNOMED         | Disorder |
| Recurrent major depressive episodes, severe, with psycho     | 755331000000108   | 44805669 | Condition | SNOMED         | Disorder |
| Mild depression                                              | 310495003         | 4149320  | Condition | SNOMED         | Disorder |
| Severe major depression, single episode, with psychotic fe   | 430852001         | 438406   | Condition | SNOMED         | Disorder |
| Single major depressive episode, severe, with psychosis, p   | 755321000000106   | 44805668 | Condition | SNOMED         | Disorder |
| Single episode of major depression in full remission         | 19527009          | 4025677  | Condition | SNOMED         | Disorder |
| Major depressive disorder in mother complicating childbirth  | 10811121000119102 | 45757195 | Condition | SNOMED         | Disorder |
| Mood disorder with depressive symptoms caused by hypnc       | 724677009         | 37110428 | Condition | SNOMED         | Disorder |
| Mild major depressive disorder co-occurent with anxiety sir  | 16265951000119109 | 37109052 | Condition | SNOMED         | Disorder |
| Single major depressive episode, severe, with psychosis      | 191604000         | 439259   | Condition | SNOMED         | Disorder |
| Mood disorder with mixed manic and depressive symptoms       | 723930006         | 37109952 | Condition | SNOMED         | Disorder |
| Primary dysthymia                                            | 83176005          | 4307951  | Condition | SNOMED         | Disorder |
| Major depressive disorder                                    | 370143000         | 4152280  | Condition | SNOMED         | Disorder |
| Mood disorder with depressive symptoms caused by dissoc      | 762345001         | 42538604 | Condition | SNOMED         | Disorder |
| Post-schizophrenic depression                                | 231485007         | 4332994  | Condition | SNOMED         | Disorder |
| Postpartum major depression in remission                     | 104851000119103   | 42534817 | Condition | SNOMED         | Disorder |
| Moderately severe major depression                           | 719592004         | 36714389 | Condition | SNOMED         | Disorder |
| Depressive disorder caused by methamphetamine                | 16238221000119109 | 37309680 | Condition | SNOMED         | Disorder |
| Maternity blues                                              | 279225001         | 4133073  | Condition | SNOMED         | Disorder |
| Secondary dysthymia early onset                              | 3109008           | 4150047  | Condition | SNOMED         | Disorder |
| Treatment resistant depression                               | 1153570009        | 607540   | Condition | SNOMED         | Disorder |
| Major depressive disorder in mother complicating pregnanc    | 10811161000119107 | 45757196 | Condition | SNOMED         | Disorder |
| Moderately severe major depression single episode            | 720453001         | 36717389 | Condition | SNOMED         | Disorder |
| Recurrent depression                                         | 191616006         | 4098302  | Condition | SNOMED         | Disorder |
| Exacerbation of major depressive disorder                    | OMOP5166047       | 1340392  | Condition | OMOP Extension | Disorder |
| Major depressive disorder, single episode with melancholic   | 63778009          | 4270907  | Condition | SNOMED         | Disorder |
| Severe depression                                            | 310497006         | 4149321  | Condition | SNOMED         | Disorder |
| Mood disorder with depressive symptoms caused by alcoho      | 723928009         | 37109950 | Condition | SNOMED         | Disorder |
| Recurrent major depressive episodes, in partial remission    | 764691000000109   | 44805549 | Condition | SNOMED         | Disorder |
| Severe major depression with psychotic features              | 73867007          | 4250023  | Condition | SNOMED         | Disorder |
| Acute depression                                             | 712823008         | 37016718 | Condition | SNOMED         | Disorder |
| Moderate major depressive disorder co-occurent with anxie    | 16266831000119100 | 37109053 | Condition | SNOMED         | Disorder |
| Postviral depression                                         | 192079006         | 4102973  | Condition | SNOMED         | Disorder |
| Depressive disorder in remission                             | 698957003         | 44782943 | Condition | SNOMED         | Disorder |
| Endogenous depression - recurrent                            | 274948002         | 4168858  | Condition | SNOMED         | Disorder |
| Minimal recurrent major depression                           | 720451004         | 36714997 | Condition | SNOMED         | Disorder |
| Severe major depression                                      | 450714000         | 42872722 | Condition | SNOMED         | Disorder |
| Recurrent major depressive disorder with melancholic featu   | 319768000         | 4205471  | Condition | SNOMED         | Disorder |
| Chronic major depressive disorder, single episode            | 14183003          | 4031328  | Condition | SNOMED         | Disorder |

|                                                             |           |          |           |        |          |
|-------------------------------------------------------------|-----------|----------|-----------|--------|----------|
| Postpartum depression                                       | 58703003  | 4239471  | Condition | SNOMED | Disorder |
| Involuntal depression                                       | 321717001 | 4154805  | Condition | SNOMED | Disorder |
| Major depression, single episode                            | 36923009  | 4282096  | Condition | SNOMED | Disorder |
| Primary dysthymia early onset                               | 38451003  | 4243308  | Condition | SNOMED | Disorder |
| Severe recurrent major depression with psychotic features   | 28475009  | 4154309  | Condition | SNOMED | Disorder |
| Severe recurrent major depression with psychotic features,  | 33078009  | 4141292  | Condition | SNOMED | Disorder |
| Minor depressive disorder                                   | 48589009  | 4174987  | Condition | SNOMED | Disorder |
| Severe major depression with psychotic features, mood-co    | 33736005  | 4144233  | Condition | SNOMED | Disorder |
| Mood disorder with depressive features due to general me    | 75837004  | 4328217  | Condition | SNOMED | Disorder |
| Mood disorder with depressive symptoms caused by anxio      | 724678004 | 37110429 | Condition | SNOMED | Disorder |
| Mood disorder with depressive symptoms caused by opioid     | 762321000 | 42538584 | Condition | SNOMED | Disorder |
| Recurrent major depressive episodes, moderate               | 191611001 | 432883   | Condition | SNOMED | Disorder |
| Moderately severe depression                                | 719593009 | 36717092 | Condition | SNOMED | Disorder |
| Premenstrual dysphoric disorder                             | 596004    | 4242733  | Condition | SNOMED | Disorder |
| Major depressive disorder, single episode with catatonic fe | 69392006  | 4287238  | Condition | SNOMED | Disorder |
| Masked depression                                           | 231500002 | 4338029  | Condition | SNOMED | Disorder |
| Mild major depression                                       | 87512008  | 4336957  | Condition | SNOMED | Disorder |

## **Appendix 1. Covariate information**

Unless otherwise stated, all variables were evaluated before baseline (index acute SARS-CoV-2 infection).

Selective serotonin reuptake inhibitor (SSRI) use (code sets 602742506, 709408353, 402078260, 738475452, 255742597, 408043043, 444624587): We defined SSRI users as individuals who were using an SSRI medication (fluoxetine, sertraline, paroxetine, citalopram, escitalopram, fluvoxamine, and vilazodone, phenotyped using RxNorm) at the time of SARS-CoV-2 infection (beginning at least 30 days prior to SARS-CoV-2 infection) and we defined all other individuals as nonusers.

Long COVID Diagnosis (post-acute sequelae of COVID-19, PASC, ICD-10 code U09.9): We defined Long COVID diagnosis as between 1 and 12 months following acute SARS-CoV-2 infection.

Number of visits pre-SARS-CoV-2 infection: The number of healthcare visits that a participant attended between the start of N3C monitoring (January 1, 2018) and incident SARS-CoV-2 infection. We define a healthcare visit as an interaction (or cluster of interactions) with a healthcare provider that was associated with a given medical condition, diagnosis, or procedure.

Healthcare visits per month before SARS-CoV-2 infection): The number of healthcare visits that a participant attended between the start of N3C monitoring (January 1, 2018) and incident SARS-CoV-2 infection divided by the number of months between their first medical visit documented in N3C and their incident SARS-CoV-2 infection.

Sex: Participant biologic sex.

Age at acute SARS-CoV-2 infection: Patient age in years.

Race/ ethnicity: A covariate that combines a patient's categorical race status and categorical ethnicity.

Common data model format: The common data model documentation format used by the contributing data provider.

Region of residence: A categorical measure of geographic region, denoted by the first digits of the patient zip code.

Body mass index (BMI): A continuous measure of body composition.

Tobacco smoking status: A binary indicator denoting current tobacco smoking status (user vs. nonuser)

Obesity: A binary indicator denoting a previous diagnosis of obesity.

Diabetes: A binary indicator denoting a previous diagnosis of diabetes.

Chronic lung disease: A binary indicator denoting a previous diagnosis of chronic lung disease.

Heart failure: A binary indicator denoting a previous diagnosis with heart failure.

Hypertension: A binary indicator of hypertension diagnosis.

Use of systemic corticosteroids: A binary indicator of whether a patient was currently receiving systemic corticosteroids.

Whether the patient was immunocompromised: A binary indicator variable denoting whether the patient was diagnosed with having a comprised immune status.

Number of COVID-19 vaccination doses before infection: The number of COVID-19 vaccination and booster doses that the patient received.

Percent of the county with an income level below the poverty line: County-level variable indicating what percent of the county received an income below the federal poverty line.

Social deprivation index score: County-level variable that quantifies social deprivation and inequality.

Depression severity score (code sets 649312011, 924814934, 937942059): A three-level categorical variable denoting the patient's severity of major depressive disorder. Levels include "mild," "moderate," and "severe." Depression severity was evaluated prior to SSRI use.

Anxiety (code set 964465007): An indicator of whether a patient was diagnosed with an anxiety disorder prior to SSRI prescription.

Antipsychotic medication use (code set 241164369): An indicator variable denoting whether a patient had a history of antipsychotic medication use prior to SSRI prescription.

Benzodiazepine medication use (code set 778556406): An indicator variable denoting whether a patient had a history of benzodiazepine medication use prior to SSRI prescription.

Post-COVID visit indicator: An indicator variable denoting whether the patient had a documented healthcare visit between 1 and 12 months following index acute SARS-CoV-2 infection (the outcome observation period).

Bone fracture (code set 889591431): A binary variable indicating a bone fracture between 1 and 12 months following SARS-CoV-2 infection.

# CONSORT Diagram

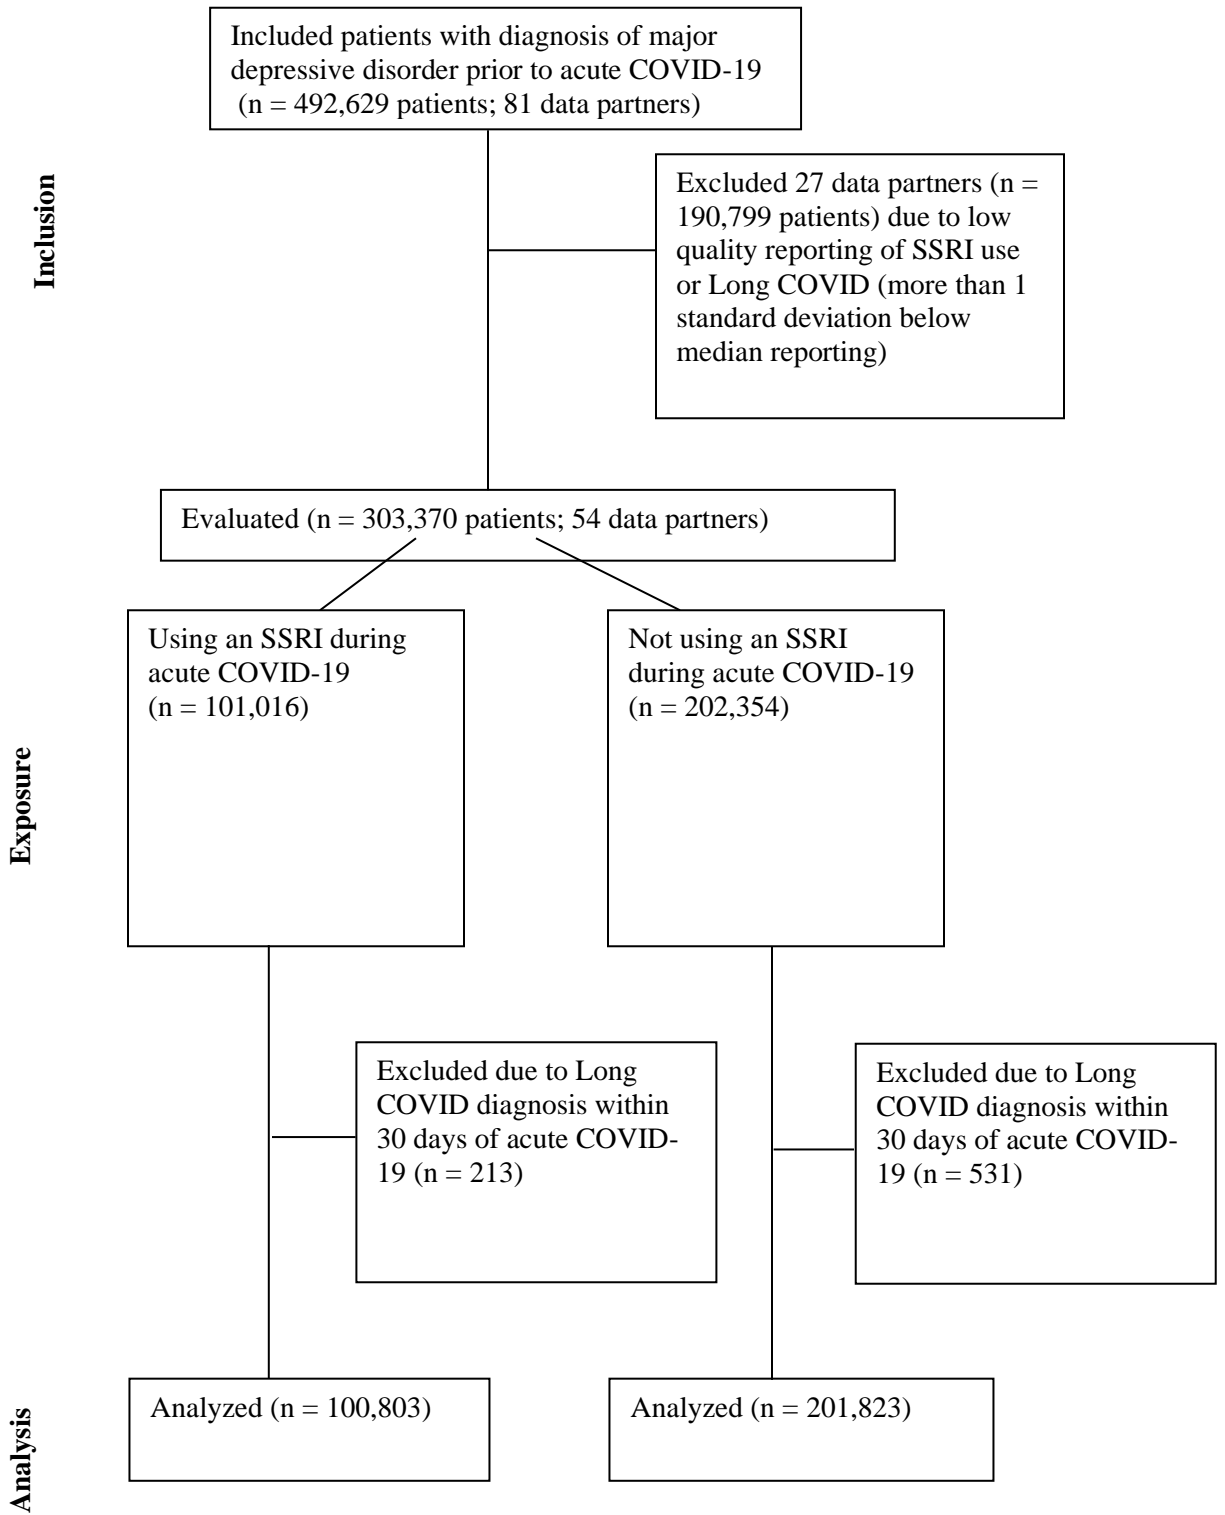

Supplemental Table 2. Exploratory analysis of dose-response relationship between fluoxetine use and Long COVID.

| Drug       | Dose | N (RR v.s no SSRI use) | N (RR v.s 10 mg dosage) |  | RR Vs. No SSRI Use (95% CI) | RR Vs. 10 mg dose (95% CI) | RD vs. no SSRI Use (95% CI)          | RD vs. 10 mg dose (95% CI)         |
|------------|------|------------------------|-------------------------|--|-----------------------------|----------------------------|--------------------------------------|------------------------------------|
|            |      |                        |                         |  |                             |                            |                                      |                                    |
| Fluoxetine | 10   | 568682                 | NA                      |  | 0.84916 (0.65182, 1.1063)   | NA                         | -0.0032206 (-0.00802, 0.0015789)     | NA                                 |
|            | 20   | 579502                 | 19952                   |  | 0.88769 (0.7836, 1.0056)    | 0.93935 (0.75283, 1.1721)  | -0.0024068 (-0.0047859, -2.7705e-05) | -0.001528 (-0.0070363, 0.0039802)  |
|            | 40   | 572562                 | 13012                   |  | 0.90261 (0.72046, 1.1308)   | 1.0164 (0.80321, 1.2861)   | -0.0020847 (-0.0064427, 0.0022732)   | 0.00042721 (-0.0057503, 0.0066048) |
|            | 60   | 564526                 | 4976                    |  | 0 (NA)                      | 1.4207 (0.65529, 3.0803)   | -0.021348 (-0.032384, -0.010313)     | 0.0099832 (-0.015715, 0.035682)    |



Supplemental Table 3. Variable importance of included covariates

| Feature                                                      | psi        | lower      | upper      | p_value   | psi_ratio  | psi_diff   | t_statistics | p_value_diff | absolute difference |
|--------------------------------------------------------------|------------|------------|------------|-----------|------------|------------|--------------|--------------|---------------------|
| FULL                                                         | 0.90101871 | 0.86065944 | 0.94327057 | 8.28E-06  | 1          | 0          |              | 1 FULL       |                     |
| SYSTEMICCORTICOSTEROIDS_before_or_day_of_covid_indicator     | 0.91624483 | 0.87533266 | 0.9590692  | 0.0001746 | 0.98338204 | -0.0152261 | -369.7215942 | 0            | 0.015226123         |
| post_COVID_visit_indicator                                   | 0.91122853 | 0.87040224 | 0.95396977 | 7.04E-05  | 0.98879555 | -0.0102098 | -248.1792109 | 0            | 0.010209814         |
| number_of_visits_before_covid                                | 0.90560244 | 0.86506316 | 0.94804151 | 2.20E-05  | 0.99493847 | -0.0045837 | -111.8177355 | 0            | 0.00458373          |
| sdi_score                                                    | 0.89670375 | 0.85679962 | 0.93846636 | 2.67E-06  | 1.00481202 | 0.00431496 | 106.0927592  | 0            | 0.00431496          |
| month_number_10                                              | 0.89754184 | 0.85732695 | 0.9396431  | 3.80E-06  | 1.00387377 | 0.00347687 | 85.1580336   | 0            | 0.003476871         |
| month_number_8                                               | 0.89768978 | 0.85745514 | 0.93981235 | 3.96E-06  | 1.00370834 | 0.00332894 | 81.51474815  | 0            | 0.003328936         |
| month_number_9                                               | 0.89786198 | 0.85762451 | 0.93998729 | 4.11E-06  | 1.00351583 | 0.00315673 | 77.29526585  | 0            | 0.00315673          |
| poverty_rate                                                 | 0.89806277 | 0.85798557 | 0.94001201 | 3.91E-06  | 1.00329147 | 0.00295594 | 72.52267035  | 0            | 0.002955942         |
| month_number_12                                              | 0.8983808  | 0.85811305 | 0.94053815 | 4.65E-06  | 1.00293629 | 0.00263791 | 64.56731375  | 0            | 0.002637911         |
| month_number_11                                              | 0.89839397 | 0.85811954 | 0.9405586  | 4.68E-06  | 1.0029216  | 0.00262475 | 64.23974794  | 0            | 0.002624745         |
| month_number_13                                              | 0.89859953 | 0.85831312 | 0.94077684 | 4.91E-06  | 1.00269217 | 0.00241919 | 59.19996962  | 0            | 0.002419186         |
| month_number_4                                               | 0.89876888 | 0.85848788 | 0.9409399  | 5.06E-06  | 1.00250324 | 0.00224983 | 55.05934933  | 0            | 0.00224983          |
| OBESITY_before_or_day_of_covid_indicator                     | 0.90243912 | 0.86202594 | 0.94474694 | 1.13E-05  | 0.99842604 | -0.0014204 | -34.70427584 | 9.71E-264    | 0.001420407         |
| OTHERIMMUNOCOMPROMISED_before_or_day_of_covid_indicator      | 0.9023589  | 0.86196513 | 0.94464563 | 1.10E-05  | 0.99851479 | -0.0013402 | -32.75222571 | 3.75E-235    | 0.00134019          |
| month_number_3                                               | 0.89974231 | 0.8594204  | 0.94195603 | 6.30E-06  | 1.00141863 | 0.0012764  | 31.22107949  | 6.97E-214    | 0.0012764           |
| CHRONICLUNGDISease_before_or_day_of_covid_indicator          | 0.89991176 | 0.85958835 | 0.94212675 | 6.52E-06  | 1.00123007 | 0.00110695 | 27.07584386  | 2.17E-161    | 0.001106952         |
| TOBACCOSMOKER_before_or_day_of_covid_indicator               | 0.89993266 | 0.85958209 | 0.94217737 | 6.64E-06  | 1.00120682 | 0.00108606 | 26.55577632  | 2.49E-155    | 0.001086055         |
| month_number_7                                               | 0.90000561 | 0.85965266 | 0.94225276 | 6.75E-06  | 1.00112567 | 0.00101311 | 24.77131173  | 2.01E-135    | 0.001013106         |
| month_number_14                                              | 0.90009201 | 0.85975349 | 0.94232316 | 6.81E-06  | 1.00102957 | 0.0009267  | 22.66277784  | 1.11E-113    | 0.000926705         |
| month_number_6                                               | 0.9001049  | 0.85976675 | 0.94233562 | 6.83E-06  | 1.00101523 | 0.00091381 | 22.34760026  | 1.36E-110    | 0.000913812         |
| month_number_5                                               | 0.90014998 | 0.85983    | 0.94236068 | 6.82E-06  | 1.00096509 | 0.00086873 | 21.24986853  | 3.48E-100    | 0.00086873          |
| BMI_max_observed_or_calculated_before_or_day_of_covid        | 0.90034418 | 0.8600001  | 0.94258088 | 7.18E-06  | 1.00074919 | 0.00067453 | 16.494632    | 4.08E-61     | 0.000674529         |
| age_at_covid                                                 | 0.90039427 | 0.86008305 | 0.94259484 | 7.13E-06  | 1.00069352 | 0.00062444 | 15.27599425  | 1.12E-52     | 0.00062444          |
| HEARTFAILURE_before_or_day_of_covid_indicator                | 0.90045936 | 0.86013211 | 0.94267735 | 7.29E-06  | 1.00062119 | 0.00055935 | 13.68103658  | 1.33E-42     | 0.000559354         |
| visits_per_month                                             | 0.90154733 | 0.86117    | 0.94381781 | 9.28E-06  | 0.99941366 | -0.0005286 | -12.92115605 | 3.44E-38     | 0.000528614         |
| number_of_COVID_vaccine_doses_before_or_day_of_covid         | 0.9014545  | 0.86119243 | 0.94359887 | 8.57E-06  | 0.99951658 | -0.0004358 | -10.6673334  | 1.45E-26     | 0.000435785         |
| month_number_1                                               | 0.90144469 | 0.86105896 | 0.9437246  | 9.13E-06  | 0.99952745 | -0.000426  | -10.41126221 | 2.21E-25     | 0.000425976         |
| region_1                                                     | 0.9006689  | 0.86031566 | 0.94291491 | 7.70E-06  | 1.00038839 | 0.00034981 | 8.553242783  | 1.20E-17     | 0.000349815         |
| region_3                                                     | 0.90074599 | 0.86038926 | 0.94299567 | 7.83E-06  | 1.00030277 | 0.00027272 | 6.667924443  | 2.60E-11     | 0.00027272          |
| region_0                                                     | 0.90075838 | 0.86040135 | 0.94300835 | 7.85E-06  | 1.00028902 | 0.00026034 | 6.365109871  | 1.95E-10     | 0.000260336         |
| race_ethnicity_American_Indian_or_Alaska_Native_Non_Hispanic | 0.90076423 | 0.86040681 | 0.94301461 | 7.87E-06  | 1.00028252 | 0.00025449 | 6.222049438  | 4.91E-10     | 0.000254486         |
| region_5                                                     | 0.9007757  | 0.86041843 | 0.9430259  | 7.88E-06  | 1.00026978 | 0.00024301 | 5.941499071  | 2.83E-09     | 0.000243011         |
| cdm_name_TRINETX                                             | 0.90125414 | 0.86088411 | 0.94351728 | 8.72E-06  | 0.99973877 | -0.0002354 | -5.7552772   | 8.65E-09     | 0.000235431         |
| race_ethnicity_Asian_Non_Hispanic                            | 0.9012369  | 0.8608672  | 0.94349971 | 8.69E-06  | 0.9997579  | -0.0002182 | -5.333841201 | 9.62E-08     | 0.000218191         |
| region_N                                                     | 0.9008184  | 0.86045794 | 0.943072   | 7.96E-06  | 1.00022237 | 0.00020031 | 4.897322431  | 9.72E-07     | 0.000200311         |
| depression_severity_Severe                                   | 0.90082749 | 0.86047065 | 0.94307711 | 7.96E-06  | 1.00021227 | 0.00019122 | 4.675219206  | 2.94E-06     | 0.000191218         |
| race_ethnicity_White_Non_Hispanic                            | 0.90082992 | 0.86046886 | 0.94308416 | 7.98E-06  | 1.00020957 | 0.00018879 | 4.615644152  | 3.92E-06     | 0.000188791         |
| region_2                                                     | 0.90083058 | 0.86046996 | 0.94308432 | 7.98E-06  | 1.00020884 | 0.00018813 | 4.599597378  | 4.23E-06     | 0.000188134         |
| sex_OTHER                                                    | 0.90084141 | 0.86048165 | 0.94309419 | 8.00E-06  | 1.00019682 | 0.00017731 | 4.334905349  | 1.46E-05     | 0.000177305         |
| region_4                                                     | 0.9011913  | 0.86082275 | 0.94345294 | 8.61E-06  | 0.99980849 | -0.0001726 | -4.219057976 | 2.45E-05     | 0.000172586         |
| cdm_name_PCORNET                                             | 0.90085346 | 0.86049703 | 0.94310257 | 8.00E-06  | 1.00018343 | 0.00016525 | 4.040277915  | 5.34E-05     | 0.000165248         |
| sex_UNKNOWN                                                  | 0.90085358 | 0.86049704 | 0.94310282 | 8.00E-06  | 1.0001833  | 0.00016513 | 4.037324393  | 5.41E-05     | 0.000165127         |
| race_ethnicity_Hispanic_or_Latino_Any_Race                   | 0.90116243 | 0.86079645 | 0.94342131 | 8.55E-06  | 0.99984052 | -0.0001437 | -3.513403951 | 0.000442424  | 0.000143716         |
| HYPERTENSION_before_or_day_of_covid_indicator                | 0.90115695 | 0.86078773 | 0.9434194  | 8.55E-06  | 0.9998466  | -0.0001382 | -3.379374302 | 0.000726538  | 0.000138239         |
| month_number_2                                               | 0.90088128 | 0.86052425 | 0.94313098 | 8.05E-06  | 1.00015255 | 0.00013743 | 3.360123463  | 0.000779105  | 0.00013743          |
| region_7                                                     | 0.90088786 | 0.86052834 | 0.94314028 | 8.07E-06  | 1.00014525 | 0.00013085 | 3.1991287    | 0.001378479  | 0.00013085          |

|                                                                       |            |            |            |          |            |            |              |             |             |
|-----------------------------------------------------------------------|------------|------------|------------|----------|------------|------------|--------------|-------------|-------------|
| cdm_name_OMOP                                                         | 0.90089106 | 0.86053496 | 0.94313972 | 8.06E-06 | 1.0001417  | 0.00012765 | 3.12108355   | 0.00180192  | 0.000127652 |
| depression_severity_Moderately                                        | 0.90113192 | 0.8607647  | 0.94339225 | 8.50E-06 | 0.99987437 | -0.0001132 | -2.767637746 | 0.00564652  | 0.000113212 |
| region_9                                                              | 0.90090854 | 0.86054547 | 0.94316481 | 8.12E-06 | 1.00012229 | 0.00011017 | 2.693421277  | 0.007072401 | 0.00011017  |
| depression_severity_Missing                                           | 0.90090946 | 0.86055129 | 0.94316036 | 8.10E-06 | 1.00012126 | 0.00010925 | 2.671018546  | 0.007562268 | 0.000109247 |
| sex_No_matching_concept                                               | 0.90112708 | 0.86076388 | 0.94338301 | 8.48E-06 | 0.99987974 | -0.0001084 | -2.649412861 | 0.008063301 | 0.00010837  |
| race_ethnicity_Other_Non_Hispanic                                     | 0.90092766 | 0.86056452 | 0.94318394 | 8.15E-06 | 1.00010107 | 9.11E-05   | 2.22610905   | 0.026007097 | 9.10557E-05 |
| bd_indicator                                                          | 0.90094431 | 0.86060434 | 0.94317518 | 8.08E-06 | 1.00008258 | 7.44E-05   | 1.819371669  | 0.068855041 | 7.43973E-05 |
| cdm_name_OMOP_PEDSNET                                                 | 0.90108913 | 0.86072084 | 0.94335071 | 8.44E-06 | 0.99992186 | -7.04E-05  | -1.721384378 | 0.085181402 | 7.04152E-05 |
| sex_FEMALE                                                            | 0.90094834 | 0.86058831 | 0.94320119 | 8.17E-06 | 1.00007811 | 7.04E-05   | 1.720474765  | 0.085346482 | 7.03708E-05 |
| depression_severity_Mild                                              | 0.90095725 | 0.86059445 | 0.9432131  | 8.19E-06 | 1.00006822 | 6.15E-05   | 1.502689627  | 0.13291941  | 6.1465E-05  |
| race_ethnicity_Black_or_African_American_Non_Hispanic                 | 0.90095733 | 0.86059623 | 0.94321132 | 8.19E-06 | 1.00006813 | 6.14E-05   | 1.500733251  | 0.133424881 | 6.13837E-05 |
| cdm_name_ACT                                                          | 0.90107583 | 0.86071511 | 0.94332915 | 8.38E-06 | 0.99993661 | -5.71E-05  | -1.396550241 | 0.162549168 | 5.71221E-05 |
| region_8                                                              | 0.90107145 | 0.86070615 | 0.9433298  | 8.39E-06 | 0.99994147 | -5.27E-05  | -1.28936012  | 0.197273213 | 5.27408E-05 |
| race_ethnicity_Native_Hawaiian_or_Other_Pacific_Islander_Non_Hispanic | 0.90098114 | 0.86062089 | 0.94323414 | 8.22E-06 | 1.00004171 | 3.76E-05   | 0.918690916  | 0.358257481 | 3.75763E-05 |
| DIABETESUNCOMPLICATED_before_or_day_of_covid_indicator                | 0.90105244 | 0.86068596 | 0.94331212 | 8.37E-06 | 0.99996257 | -3.37E-05  | -0.824503768 | 0.40965357  | 3.37265E-05 |
| race_ethnicity_Unknown                                                | 0.90104989 | 0.86068967 | 0.94330272 | 8.33E-06 | 0.99996539 | -3.12E-05  | -0.762352045 | 0.445850097 | 3.11817E-05 |
| DIABETESCOMPLICATED_before_or_day_of_covid_indicator                  | 0.90103523 | 0.86066538 | 0.94329864 | 8.35E-06 | 0.99998167 | -1.65E-05  | -0.403680557 | 0.686447724 | 1.65133E-05 |
| region_6                                                              | 0.90101275 | 0.86064979 | 0.94326867 | 8.29E-06 | 1.00000661 | 5.96E-06   | 0.145667061  | 0.884184254 | 5.95828E-06 |
| sex_MALE                                                              | 0.90102452 | 0.86065828 | 0.94328399 | 8.32E-06 | 0.99999356 | -5.80E-06  | -0.14190895  | 0.887151953 | 5.8048E-06  |

Grouped covariates

|                                                                                                                                                                                                                                                                                                                                                                                                                                                                                                                                                                                                             |            |            |            |            |            |            |             |   |             |
|-------------------------------------------------------------------------------------------------------------------------------------------------------------------------------------------------------------------------------------------------------------------------------------------------------------------------------------------------------------------------------------------------------------------------------------------------------------------------------------------------------------------------------------------------------------------------------------------------------------|------------|------------|------------|------------|------------|------------|-------------|---|-------------|
| healthcare utilization (number of visits before covid, visits per month before covid, post-COVID observation indicator)                                                                                                                                                                                                                                                                                                                                                                                                                                                                                     | 0.92972829 | 0.88813404 | 0.97327054 | 0.0018072  | 0.96912046 | -0.0287096 | -691.263124 | 0 | 0.028709578 |
| general health and comorbidities<br>(BMI_max_observed_or_calculated_before_or_day_of_covid,<br>CHRONICLUNGDISease_before_or_day_of_covid_indicator,<br>DIABETESUNCOMPLICATED_before_or_day_of_covid_indicator,<br>DIABETESCOMPLICATED_before_or_day_of_covid_indicator,<br>OBESITY_before_or_day_of_covid_indicator,<br>OTHERIMMUNOCOMPROMISED_before_or_day_of_covid_indicator,<br>TOBACCOSMOKER_before_or_day_of_covid_indicator,<br>SYSTEMICCORTICOSTEROIDS_before_or_day_of_covid_indicator,<br>HYPERTENSION_before_or_day_of_covid_indicator,<br>number_of_COVID_vaccine_doses_before_or_day_of_covid) | 0.92030803 | 0.87930982 | 0.9632178  | 0.00035451 | 0.97904037 | -0.0192893 | -467.885442 | 0 | 0.01928932  |

## **Appendix 2. Nonparametric sensitivity analysis.**

Our nonparametric sensitivity analysis contextualizes these relationships and indicates that, for our observed, adjusted estimate to be a Type 1 error, we would need to have 0.65 units of bias, where one unit refers to the difference between adjusted and unadjusted estimates (33). The qualitative shift in our observed measure of association following multivariate adjustment underscores the need for additional research in this area.
